# Supplementary material for: Time-Course RNA-Seq Analysis Reveals Transcriptional Changes in Rice Plants Triggered by Rice stripe virus Infection
Source: PLoS One. 2015 Aug 25;10(8):e0136736. doi: 10.1371/journal.pone.0136736 (PMC4549299; doi:10.1371/journal.pone.0136736)
Supplement: S1 Table — (XLSX) [file pone.0136736.s008.xlsx]

## Sheet: Sheet1
S1 Table. Primers used for real-time PCR to confirm RNA-Seq data
Genes	Primer sequences	Length	Product length
1_Os03g61160_F	GTCATCAGCGGTCGTCGTTCG	21	100
1_Os03g61160_R	AATGCCCAGCTGCTCCGTGTC	21
2_Os08g32750_F	CACCCGGGACGAGTTTCTGC	20	96
2_Os08g32750_R	GGATCCGCCCCACCAATG	18
3_Os01g51840_F	TTAGGAAAGAAAGAGAAGCCAAGGTC	26	97
3_Os01g51840_R	CTGATTTGGTGGAGAACGAAGAC	23
4_Os01g38140_F	CCGCTGCTGCCAAAACGAGT	20	98
4_Os01g38140_R	AGGCGAGGGGGTGGGTGTCT	20
5_Os02g47280_F	CGCTGCGTCCCTTCTTTGATGA	22	100
5_Os02g47280_R	AGTTGGGTGCCTGAGAATGACGAA	24
6_Os06g09530_F	CTGAAGAAGGAGCATAAACAACACTG	26	99
6_Os06g09530_R	ACCGCATCGTCCATCTTCAAC	21
7_Os02g51250_F	AATGCTAGATGAAATAAGGGTTGAAG	26	100
7_Os02g51250_R	AATCGGCCTTGTCTTTACTTTTT	23
8_Os01g69010_F	GAAGCAGCAGGTGGTGGGTGTG	22	96
8_Os01g69010_R	GCGGCGGCCTTCTTGTCG	18
9_Os08g38790_F	TGTGGCAGCGGGAGGAGTC	19	98
9_Os08g38790_R	GGCCGCGCAGAGGTAGAACG	20
10_Os07g48980_F	CGTGGTGGACCCGGAGGAGAT	21	95
10_Os07g48980_R	GCGCGATGATGACGGAGTTGAT	22
11_Os09g23300_F	GGCCACCTCGGTCGTCGTC	19	99
11_Os09g23300_R	GTCTGGAAGGCGCTGATGAAGG	22
12_Os01g24790_F	GCAGGGAGGCCGACAACA	18	99
12_Os01g24790_R	GGCGGTGCTCGGGGTGTG	18
13_Os08g42350_F	CTCCGCACCCTCGCCTTCTT	20	91
13_Os08g42350_R	GGTGGGGCTTGGGGACGAG	19
14_Os08g02030_F	TGCTGCTCGCGCTCGTGTG	19	90
14_Os08g02030_R	GGCACCCGACGACCACCAC	19
15_Os09g31430_F	CTGAACAGTCGGCGATGGTGAA	22	92
15_Os09g31430_R	GTTAGGCGGCGGTATACTCTTAGC	24
16_Os04g51796_F	TGCAGAGACACCATCCAACCA	21	100
16_Os04g51796_R	CCTTGGTGATGTATGGTGTGGTG	23
17_Os07g46950_F	GTCACGGTGGAGGCGGATGT	20	91
17_Os07g46950_R	CGATGCCGGCGTTGCTGTA	19
18_Os12g03640_F	CCATAGGTTACATTGCTCCAGAA	23	91
18_Os12g03640_R	AGCTCAAGAAGAACGACTCCATAACT	26
19_Os12g36430_F	CTGACTATGACGGCACAGTCGTGT	24	98
19_Os12g36430_R	ACTACCTATCCTTGTACTGTT	21
20_Os01g52470_F	TTCGCCGCGCCTGATGG	17	100
20_Os01g52470_R	CTCGCCGTTCCTGCTGTTGA	20
21_Os03g47140_F	TGAAGAAAACAATGGCCCACTGCTAA	26	94
21_Os03g47140_R	CTTCTCCGGTTTGTTCTGTTGCTTCA	26
UBQ5_F	CAACCACTTCGACCGCCACTACT	23	95
UBQ5_R	TCCGCCCCCAAAGAACAGG	19
