# Supplementary material for: Time-Course RNA-Seq Analysis Reveals Transcriptional Changes in Rice Plants Triggered by Rice stripe virus Infection
Source: PLoS One. 2015 Aug 25;10(8):e0136736. doi: 10.1371/journal.pone.0136736 (PMC4549299; doi:10.1371/journal.pone.0136736)
Supplement: S6 Table — (XLSX) [file pone.0136736.s013.xlsx]

## Sheet: Sheet1
S6 Table. The expression ratios of 35 rice genes required for flower development
Locus	3 dpi	7 dpi	15 dpi	Putative Function
LOC_Os01g08190.1	-1.02	1.15	-1.31	transcriptional corepressor LEUNIG
LOC_Os01g08190.2	-0.89	1.46	-1.52	transcriptional corepressor LEUNIG
LOC_Os01g08190.5	-0.11	0.15	-1.39	transcriptional corepressor LEUNIG
LOC_Os01g10504.1	-0.6	0.02	-1.39	OsMADS3 - MADS-box family gene with MIKCc type-box
LOC_Os01g10504.3	0.4	0.93	-2.52	OsMADS3 - MADS-box family gene with MIKCc type-box
LOC_Os01g14430.1	1.79	1.54	-1.39	DNA binding protein
LOC_Os01g52514.1	NA	NA	-1.65	B3 DNA binding domain containing protein
LOC_Os02g45770.1	2.3	0.16	-1.39	OsMADS6 - MADS-box family gene with MIKCc type-box
LOC_Os03g11600.1	1.86	-0.16	-1.24	YABBY domain containing protein
LOC_Os03g11600.2	0.74	0.76	-1.48	YABBY domain containing protein
LOC_Os03g11614.1	0.73	0.15	-1.29	OsMADS1 - MADS-box family gene with MIKCc type-box
LOC_Os03g15340.1	NA	1.22	-2.07	plastocyanin-like domain containing protein
LOC_Os04g38570.1	NA	0.22	-1.39	multidrug resistance protein
LOC_Os05g07720.1	NA	NA	-1.07	alliin lyase precursor
LOC_Os05g11414.1	0.24	-0.74	-1.13	OsMADS58 - MADS-box family gene with MIKCc type-box
LOC_Os05g51740.1	-1.43	-0.08	-1.65	receptor protein kinase CLAVATA1 precursor
LOC_Os06g06320.1	0.53	-1.44	-2.39	FTL2 FT-Like2 homologous to Flowering Locus T gene
LOC_Os06g06900.1	-1.32	-0.1	-1.84	helix-loop-helix DNA-binding domain containing protein
LOC_Os06g16810.1	-1.6	0.54	-1.65	polygalacturonase precursor
LOC_Os07g15770.1	1.44	-0.11	-2.07	CCT motif family protein
LOC_Os08g41960.1	0.34	-0.35	-1.7	OsMADS37 - MADS-box family gene with MIKC* type-box
LOC_Os09g10980.1	NA	0.22	-1.65	ZOS9-02 - C2H2 zinc finger protein
LOC_Os09g27620.1	-0.76	-0.37	-1.51	PHD-finger domain containing protein
LOC_Os09g28210.1	0.44	1.29	-1.03	bHelix-loop-helix transcription factor
LOC_Os09g36910.1	3.57	0.22	-2.87	bZIP transcription factor domain containing protein
LOC_Os10g05180.1	1.4	0.6	-1.24	26S proteasome regulatory subunit S5A
LOC_Os11g01530.1	0.69	-0.63	-1.09	ferritin-1, chloroplast precursor
LOC_Os11g01530.2	0.64	-0.61	-1.07	ferritin-1, chloroplast precursor
LOC_Os11g31470.4	-1.18	-0.48	-1.58	expressed protein
LOC_Os11g31540.1	0.76	-0.95	-2.68	BRASSINOSTEROID INSENSITIVE 1-associated receptor kinase 1 precursor
LOC_Os11g48000.1	1.17	0.58	-1.01	ZOS11-11 - C2H2 zinc finger protein
LOC_Os12g01530.1	1.09	-0.9	-1.03	ferritin-1, chloroplast precursor
LOC_Os12g01530.2	1.02	-0.9	-1.05	ferritin-1, chloroplast precursor
LOC_Os12g01530.3	1.08	-0.97	-1	ferritin-1, chloroplast precursor
LOC_Os12g25660.1	1.49	2.33	-1.44	cytochrome P450
LOC_Os12g31748.2	-0.83	2.8	-2.07	OsMADS20 - MADS-box family gene with MIKCc type-box
