# Supplementary material for: Time-Course RNA-Seq Analysis Reveals Transcriptional Changes in Rice Plants Triggered by Rice stripe virus Infection
Source: PLoS One. 2015 Aug 25;10(8):e0136736. doi: 10.1371/journal.pone.0136736 (PMC4549299; doi:10.1371/journal.pone.0136736)
Supplement: S9 Table — (XLSX) [file pone.0136736.s016.xlsx]

## Sheet: Sheet1
S9 Table. The expression ratios of 405 genes containing NBS-LRR domains.
Locus	3 dpi	7 dpi	15 dpi	Putative function
LOC_Os01g02250.1	NA	NA	NA	RGA-1, putative, expressed
LOC_Os01g02280.1	-0.0578791	-0.187745	-0.414701	Leucine Rich Repeat family protein, expressed
LOC_Os01g05600.1	-0.683167	-0.85555	-0.356166	NBS-LRR disease resistance protein, putative, expressed
LOC_Os01g05620.1	0.323755	-0.610184	-0.0225252	NBS-LRR disease resistance protein, putative, expressed
LOC_Os01g15580.1	-0.226575	-0.0453896	0.43092	disease resistance protein RGA2, putative, expressed
LOC_Os01g16370.1	-1.363	-0.132312	-0.235787	NBS-LRR type disease resistance protein, putative, expressed
LOC_Os01g16390.1	NA	NA	NA	NB-ARC domain containing protein, expressed
LOC_Os01g16400.1	0.566612	-0.521355	0.42031	NB-ARC domain containing protein, expressed
LOC_Os01g17130.1	NA	NA	NA	retrotransposon protein, putative, Ty3-gypsy subclass, expressed
LOC_Os01g20720.1	-0.755316	-0.0925113	0.00888352	CC-NBS-LRR, putative, expressed
LOC_Os01g21240.1	-0.783885	-0.387054	-0.304787	MLA6 protein, putative, expressed
LOC_Os01g23380.1	0.390281	0.457158	0.047777	stripe rust resistance protein Yr10, putative, expressed
LOC_Os01g24820.1	0.981649	-2.02143	0.883353	NB-ARC domain containing protein, expressed
LOC_Os01g25630.1	NA	0.215611	NA	NB-ARC domain containing protein, expressed
LOC_Os01g25720.2	0.0365736	-0.33162	0.274385	disease resistance protein RGA4, putative, expressed
LOC_Os01g25740.1	0.0856499	-0.194113	0.00888352	powdery mildew resistance protein PM3F, putative, expressed
LOC_Os01g25760.1	-0.120834	-0.615682	-0.288839	powdery mildew resistance protein PM3F, putative, expressed
LOC_Os01g25810.1	-0.0894948	-0.290441	-0.125659	powdery mildew resistance protein PM3A, putative, expressed
LOC_Os01g33684.1	0.25321	-0.393961	0.15676	disease resistance RPP13-like protein 1, putative, expressed
LOC_Os01g33810.1	-0.825706	-1.00678	-0.0651171	disease resistance protein RPM1, putative, expressed
LOC_Os01g35254.1	-0.0183507	NA	NA	transposon protein, putative, CACTA, En/Spm sub-class, expressed
LOC_Os01g36640.1	0.369987	-0.206823	0.0748132	disease resistance protein RPM1, putative, expressed
LOC_Os01g41890.1	-1.60951	0.412412	0.225333	MLA1, putative, expressed
LOC_Os01g42330.1	-0.225509	0.305975	0.317827	retrotransposon protein, putative, unclassified, expressed
LOC_Os01g57270.1	-0.53218	-0.45424	0.150962	disease resistance RPP13-like protein 1, putative, expressed
LOC_Os01g57280.1	-0.261552	-0.343325	0.338057	rp1, putative, expressed
LOC_Os01g57310.2	0.232963	-0.0544594	0.296893	rp1, putative, expressed
LOC_Os01g57340.1	0.267254	0.13076	0.255909	rp1, putative, expressed
LOC_Os01g57870.1	0.778215	0.362289	0.350617	disease resistance protein RPS2, putative, expressed
LOC_Os01g58530.1	-0.601438	0.0257721	0.247386	NB-ARC/LRR disease resistance protein, putative, expressed
LOC_Os01g70080.1	0.61712	0.661274	0.28538	NB-ARC domain containing protein, expressed
LOC_Os01g71114.1	0.532595	-0.701927	0.0982769	disease resistance protein RGA4, putative, expressed
LOC_Os01g72390.1	NA	NA	NA	NBS type disease resistance protein, putative, expressed
LOC_Os01g72680.1	0.718615	NA	NA	disease resistance protein RPS2, putative, expressed
LOC_Os02g02640.1	-0.112678	-0.517936	0.0604138	NBS-LRR disease resistance protein, putative, expressed
LOC_Os02g02670.1	0.393312	-0.535321	-0.00994035	NBS-LRR disease resistance protein, putative, expressed
LOC_Os02g04530.1	-0.487836	-1.32871	-1.38705	rust resistance-like protein RP1, putative, expressed
LOC_Os02g09790.1	-1.40206	-1.34021	0.063207	disease resistance protein RPM1, putative, expressed
LOC_Os02g16060.1	-0.581618	-0.349452	1.35938	RGA-1, putative, expressed
LOC_Os02g16270.1	-0.340279	-1.11612	-0.16041	xa1, putative, expressed
LOC_Os02g16330.1	NA	NA	NA	xa1, putative, expressed
LOC_Os02g17304.1	0.297634	-0.0638239	0.208463	resistance protein, putative, expressed
LOC_Os02g18000.1	-0.0952195	0.432207	-0.278775	disease resistance protein RGA2, putative, expressed
LOC_Os02g18070.1	-1.51392	0.163365	-0.840151	NB-ARC domain containing protein, expressed
LOC_Os02g18080.1	-1.12865	0.0267083	0.330812	NB-ARC domain containing protein, expressed
LOC_Os02g18140.1	-0.218738	0.977451	-0.52746	NBS type disease resistance protein, putative, expressed
LOC_Os02g18510.1	0.551965	0.730184	0.671849	stripe rust resistance protein Yr10, putative, expressed
LOC_Os02g19750.1	NA	NA	NA	NBS-LRR type disease resistance protein, putative, expressed
LOC_Os02g19890.1	-0.544949	0.0668673	0.160596	stripe rust resistance protein Yr10, putative, expressed
LOC_Os02g20210.1	-0.354634	-0.104478	0.300532	disease resistance protein RGA1, putative, expressed
LOC_Os02g20460.1	NA	NA	NA	Leucine Rich Repeat family protein, expressed
LOC_Os02g25900.1	0.218429	-0.0294525	0.155501	pollen signalling protein with adenylyl cyclase activity, putative, expressed
LOC_Os02g27500.1	0.222657	-0.171412	-1.67393	Leucine Rich Repeat family protein, expressed
LOC_Os02g30150.1	-0.248648	-0.457789	0.212417	disease resistance protein, putative, expressed
LOC_Os02g35210.1	-0.466163	0.0929661	0.217942	resistance protein, putative, expressed
LOC_Os03g10900.1	0.244684	-1.45681	-0.313045	disease resistance protein, putative, expressed
LOC_Os03g20840.1	0.267051	0.26411	0.886674	disease resistance RPP13-like protein 1, putative, expressed
LOC_Os03g26260.1	NA	NA	NA	NB-ARC domain containing protein, expressed
LOC_Os03g30910.1	-0.387276	-0.2356	0.173043	disease resistance protein RPM1, putative, expressed
LOC_Os03g36920.1	-0.603313	-0.521355	-0.155315	disease resistance protein, putative, expressed
LOC_Os03g37720.1	NA	NA	NA	NBS-LRR type disease resistance protein Rps1-k-1, putative, expressed
LOC_Os03g38250.1	-0.335833	-0.171412	0.676571	disease resistance RPP13-like protein 1, putative, expressed
LOC_Os03g38330.1	-0.326982	-0.252725	-0.61318	disease resistance RPP13-like protein 1, putative, expressed
LOC_Os03g40194.1	0.455982	0.698393	0.821687	disease resistance RPP13-like protein 1, putative, expressed
LOC_Os03g46550.1	0.0867062	0.381345	0.00213201	RGH1A, putative, expressed
LOC_Os03g48320.1	1.23056	0.433791	0.272931	disease resistance RPP13-like protein 1, putative, expressed
LOC_Os03g48370.1	0.388275	0.540046	0.913509	disease resistance RPP13-like protein 1, putative, expressed
LOC_Os03g50150.1	0.201915	0.1155	-0.155003	NB-ARC domain containing protein, expressed
LOC_Os03g63150.2	1.06043	-0.194841	0.249123	powdery mildew resistance protein PM3b, putative, expressed
LOC_Os03g63200.1	0.575657	-0.0139769	-0.233155	powdery mildew resistance protein PM3b, putative, expressed
LOC_Os03g63240.1	NA	-1.36935	NA	disease resistance protein, putative, expressed
LOC_Os04g02030.1	0.894186	0.58758	-1.31304	rp1, putative, expressed
LOC_Os04g02110.1	-0.056228	0.428882	0.53237	disease resistance protein RGA3, putative, expressed
LOC_Os04g02450.1	-0.0183507	-0.0157145	-0.328151	rust-resistance protein Lr21, putative, expressed
LOC_Os04g02860.1	-1.16467	1.00569	-0.0326956	disease resistance protein RPM1, putative, expressed
LOC_Os04g11430.1	NA	-0.0253971	0.604734	disease resistance RPP13-like protein 1, putative, expressed
LOC_Os04g14220.2	0.223278	-0.202266	-0.302729	disease resistance protein RPM1, putative, expressed
LOC_Os04g21890.1	-0.510411	-0.250773	-0.127139	disease resistance protein RPM1, putative, expressed
LOC_Os04g22090.1	NA	NA	NA	NB-ARC domain containing protein, expressed
LOC_Os04g24700.1	NA	NA	NA	expressed protein
LOC_Os04g25900.1	-0.755316	-0.939667	-0.427687	go35 NBS-LRR, putative, expressed
LOC_Os04g30530.1	-0.170354	0.630648	0.519845	disease resistance protein RGA2, putative, expressed
LOC_Os04g30610.1	NA	NA	NA	disease resistance protein RGA2, putative, expressed
LOC_Os04g30660.1	NA	-2.78439	-1.65008	NBS type disease resistance protein, putative, expressed
LOC_Os04g30690.1	-2.47778	0.800573	-0.550544	NBS type disease resistance protein, putative, expressed
LOC_Os04g30930.1	-0.455931	0.134223	-0.199866	NB-ARC domain containing protein, expressed
LOC_Os04g39460.1	1.30358	0.215611	-0.0651171	NBS-LRR type disease resistance protein, putative, expressed
LOC_Os04g41370.1	0.222657	-0.807473	-1.58868	Leucine Rich Repeat family protein, expressed
LOC_Os04g43340.1	0.435734	0.262715	0.209848	disease resistance RPP13-like protein 1, putative, expressed
LOC_Os04g43440.1	-1.56907	-0.125308	0.661507	NB-ARC/LRR disease resistance protein, putative, expressed
LOC_Os04g46300.1	-0.16089	0.121429	0.0782471	disease resistance protein RPM1, putative, expressed
LOC_Os04g52970.1	-0.181925	-0.40056	0.081657	NBS-LRR disease resistance protein, putative, expressed
LOC_Os04g53030.1	-0.270876	-0.418131	-0.275805	NBS-LRR disease resistance protein, putative, expressed
LOC_Os04g53040.1	-0.451047	0.0324623	0.296042	retrotransposon protein, putative, unclassified, expressed
LOC_Os04g53050.1	0.0569374	0.402697	-0.884545	disease resistance RPP13-like protein 1, putative, expressed
LOC_Os04g53120.1	-0.303579	-0.245455	-0.327566	NB-ARC domain containing protein, expressed
LOC_Os04g53160.1	-0.46415	-0.0140203	0.341972	NBS-LRR disease resistance protein, putative, expressed
LOC_Os04g53496.1	-0.203383	-0.46085	-0.117313	NBS-LRR disease resistance protein, putative, expressed
LOC_Os05g12570.1	NA	NA	NA	NB-ARC domain containing protein, expressed
LOC_Os05g12770.1	-1.34028	0.685096	-0.257762	NB-ARC domain containing protein, expressed
LOC_Os05g15040.1	0.715501	0.0584183	-0.0437082	NB-ARC domain containing protein, expressed
LOC_Os05g16180.1	NA	NA	NA	NB-ARC domain containing protein, expressed
LOC_Os05g16200.1	NA	NA	NA	blight resistance protein T118, putative, expressed
LOC_Os05g23990.1	-0.0410039	-0.088631	0.363921	rp3 protein, putative, expressed
LOC_Os05g30220.1	-0.157675	-0.385173	-0.170313	disease resistance RPP13-like protein 1, putative, expressed
LOC_Os05g31530.1	0.355604	-0.536193	0.266263	disease resistance protein RGA4, putative, expressed
LOC_Os05g31550.1	NA	NA	NA	disease resistance protein RGA4, putative, expressed
LOC_Os05g31570.1	0.700414	-0.304581	0.501622	disease resistance protein RGA4, putative, expressed
LOC_Os05g34220.1	-0.00535828	0.257244	0.494242	vrga1, putative, expressed
LOC_Os05g34230.1	-0.23161	-0.0144033	0.285818	disease resistance protein RGA3, putative, expressed
LOC_Os05g40150.1	-0.735951	-0.312691	0.244269	RGH2B, putative, expressed
LOC_Os05g40160.1	0.450554	0.434332	-0.00756604	NB-ARC domain containing protein, expressed
LOC_Os05g41290.1	0.029128	-0.33531	0.539523	disease resistance RPP13-like protein 1, putative, expressed
LOC_Os05g41310.1	0.0582434	-0.0136237	-0.325863	disease resistance protein RGA2, putative, expressed
LOC_Os05g50780.1	NA	-2.10632	NA	NBS-LRR resistance-like protein B11, putative, expressed
LOC_Os06g03500.1	1.14211	-0.128343	0.164365	NBS-LRR disease resistance protein, putative, expressed
LOC_Os06g05359.1	0.566612	-0.751412	-0.399186	NBS-LRR disease resistance protein, putative, expressed
LOC_Os06g06380.1	-0.154357	-0.257641	-0.305667	NBS-LRR type disease resistance protein, putative, expressed
LOC_Os06g06390.1	0.765921	-0.0614986	-0.0651171	NBS-LRR type disease resistance protein, putative, expressed
LOC_Os06g06400.1	-0.353811	-0.364096	-0.0562932	NBS-LRR type disease resistance protein, putative, expressed
LOC_Os06g06850.1	0.0116025	0.784386	-0.961739	resistance protein LR10, putative, expressed
LOC_Os06g06860.1	-0.854852	0.367614	1.93488	MLA1, putative, expressed
LOC_Os06g15750.1	0.083782	-0.572292	-0.727042	NB-ARC domain containing protein, expressed
LOC_Os06g16790.1	-2.60331	NA	NA	go35 NBS-LRR, putative, expressed
LOC_Os06g17880.1	-0.262178	0.429951	0.246626	NBS-LRR disease resistance protein, putative, expressed
LOC_Os06g17900.1	-0.666878	0.350963	-0.802083	disease resistance protein RPM1, putative, expressed
LOC_Os06g17920.1	-2.82571	-1.03232	-0.364677	NBS-LRR disease resistance protein, putative, expressed
LOC_Os06g17930.1	NA	NA	NA	NBS-LRR disease resistance protein, putative, expressed
LOC_Os06g17950.1	0.649074	-0.0442139	0.049785	NBS-LRR disease resistance protein, putative, expressed
LOC_Os06g20050.1	-0.445772	-0.882	0.104808	NBS type disease resistance protein, putative, expressed
LOC_Os06g22460.1	NA	NA	NA	disease resistance protein RPM1, putative, expressed
LOC_Os06g30430.1	NA	NA	NA	disease resistance protein RPM1, putative, expressed
LOC_Os06g33360.1	-0.603313	0.730184	0.671849	RGH1A, putative, expressed
LOC_Os06g41480.1	0.0489177	0.570888	1.08435	vrga1, putative, expressed
LOC_Os06g41640.1	-0.0378469	-0.0209512	0.96944	CC-NBS-LRR protein, putative, expressed
LOC_Os06g41660.1	0.101074	-0.0515317	0.225859	CC-NBS-LRR protein, putative, expressed
LOC_Os06g41670.1	-1.43339	0.0781075	0.34992	CC-NBS-LRR protein, putative, expressed
LOC_Os06g41690.1	-0.00493023	-0.591744	-0.394425	retrotransposon protein, putative, unclassified, expressed
LOC_Os06g45690.1	0.614867	0.116833	-0.51492	symbiosis-related disease resistance protein, putative, expressed
LOC_Os06g47800.1	-0.0610301	0.230167	0.171564	disease resistance protein RGA3, putative, expressed
LOC_Os06g48520.1	0.316833	-0.548761	0.402662	disease resistance protein RPM1, putative, expressed
LOC_Os06g49380.5	0.183755	0.0670145	-0.176538	NBS-LRR disease resistance protein, putative, expressed
LOC_Os06g49390.1	-0.268329	-0.456503	-0.0299276	NBS-LRR disease resistance protein, putative, expressed
LOC_Os07g04900.1	0.396687	-1.36935	0.934883	NBS-LRR disease resistance protein, putative, expressed
LOC_Os07g08890.1	0.48415	0.514269	-0.12097	disease resistance protein RPM1, putative, expressed
LOC_Os07g09900.1	NA	0.215611	NA	disease resistance protein RPM1, putative, expressed
LOC_Os07g17220.1	0.265681	0.396941	-0.302156	disease resistance protein, putative, expressed
LOC_Os07g17230.1	-0.208873	-0.0241681	0.193859	WRKY123, expressed
LOC_Os07g17250.1	-0.274648	0.0496771	-0.0984932	disease resistance RPP13-like protein 1, putative, expressed
LOC_Os07g19320.1	-2.47778	-0.603817	-0.765557	stripe rust resistance protein Yr10, putative, expressed
LOC_Os07g26430.1	NA	NA	NA	resistance protein, putative, expressed
LOC_Os07g26730.1	NA	NA	NA	expressed protein
LOC_Os07g27370.1	-1.43339	-0.466213	0.12251	resistance protein, putative, expressed
LOC_Os07g29810.1	0.0741158	0.346717	0.933231	disease resistant protein, identical, putative, expressed
LOC_Os07g29820.1	-0.178364	0.428063	0.118604	NBS-LRR disease resistance protein, putative, expressed
LOC_Os07g31800.1	NA	NA	NA	NB-ARC domain containing protein, expressed
LOC_Os07g33690.1	0.0406634	-0.421202	0.354525	NBS-LRR type disease resistance protein Hom-F, putative, expressed
LOC_Os07g33720.1	-0.808558	0.307165	-0.432573	disease resistance protein, putative, expressed
LOC_Os07g33730.1	-0.231502	-0.0527866	0.201637	NB-ARC domain containing protein, expressed
LOC_Os07g33740.1	0.285983	0.433516	0.459974	vrga1, putative, expressed
LOC_Os07g40810.1	-0.236127	-0.436133	-0.0811769	NBS-LRR type disease resistance protein, putative, expressed
LOC_Os08g01580.1	NA	NA	NA	NBS-LRR disease resistance protein, putative, expressed
LOC_Os08g05440.1	0.371095	0.415934	0.471359	NB-ARC domain containing protein, expressed
LOC_Os08g05800.1	-1.01835	NA	0.742238	retrotransposon protein, putative, unclassified, expressed
LOC_Os08g07330.2	-0.0995229	0.193096	0.343386	RGH1A, putative, expressed
LOC_Os08g07340.1	-0.0183507	-0.575293	0.464136	mla1, putative, expressed
LOC_Os08g07380.1	-1.0943	-0.729941	-0.66551	retrotransposon protein, putative, unclassified, expressed
LOC_Os08g07774.1	-0.266052	-0.127451	0.145327	disease resistance protein RPM1, putative, expressed
LOC_Os08g07890.1	0.733509	0.70575	-0.663019	NB-ARC domain containing protein, expressed
LOC_Os08g07930.1	NA	NA	NA	resistance protein, putative, expressed
LOC_Os08g07940.1	-0.340279	NA	NA	disease resistance protein RPM1, putative, expressed
LOC_Os08g07950.1	NA	0.537539	-1.06512	NB-ARC domain containing protein, expressed
LOC_Os08g09110.1	-0.388935	0.0208583	0.165935	NB-ARC domain containing protein, expressed
LOC_Os08g09430.1	-0.603313	-2.10632	NA	disease resistance protein RPM1, putative, expressed
LOC_Os08g10260.1	-0.211735	-0.367675	-0.57969	NBS-LRR disease resistance protein, putative, expressed
LOC_Os08g10430.1	0.113288	0.0439464	0.573124	NBS-LRR disease resistance protein, putative, expressed
LOC_Os08g10440.1	0.566612	0.184805	0.574523	NBS-LRR disease resistance protein, putative, expressed
LOC_Os08g12740.2	-0.269451	-0.208235	0.448016	disease resistance protein RGA3, putative, expressed
LOC_Os08g12740.2	NA	NA	NA	disease resistance protein RGA3, putative, expressed
LOC_Os08g13800.1	-2.13991	-0.383851	0.317131	NB-ARC domain containing protein, expressed
LOC_Os08g14830.1	NA	NA	NA	NB-ARC domain containing protein, expressed
LOC_Os08g15880.1	NA	-1.59174	NA	NBS-LRR disease resistance protein, putative, expressed
LOC_Os08g16070.1	NA	NA	NA	NB-ARC domain containing protein, expressed
LOC_Os08g16120.1	0.244684	-0.577938	0.39883	disease resistance protein RPM1, putative, expressed
LOC_Os08g16460.1	-3.92524	-0.823917	NA	NBS-LRR disease resistance protein, putative, expressed
LOC_Os08g19694.1	3.15157	1.21561	0.256811	NB-ARC domain containing protein, expressed
LOC_Os08g19980.1	0.151767	0.421002	0.417484	NBS-LRR disease resistance protein, putative, expressed
LOC_Os08g20000.1	0.0476265	-0.11927	0.223942	NB-ARC domain containing protein, expressed
LOC_Os08g24380.1	0.0305589	0.476571	-0.298607	NB-ARC domain containing protein, expressed
LOC_Os08g28460.1	NA	NA	NA	NBS-LRR disease resistance protein, putative, expressed
LOC_Os08g28540.1	NA	NA	NA	resistance protein LR10, putative, expressed
LOC_Os08g28570.1	-0.0183507	1.06361	1.67185	resistance protein, putative, expressed
LOC_Os08g28600.1	-2.47778	NA	NA	resistance protein, putative, expressed
LOC_Os08g29809.1	-0.150454	-0.0419895	0.627793	resistance protein LR10, putative, expressed
LOC_Os08g29854.1	0.250836	0.163683	0.344867	RGH1A, putative, expressed
LOC_Os08g30634.1	-0.415634	-0.150543	0.41293	DC1 domain containing protein, expressed
LOC_Os08g31780.1	-0.0480016	0.0720963	0.68933	MLA1, putative, expressed
LOC_Os08g31800.1	0.104913	-0.0612655	0.454299	RGH1A, putative, expressed
LOC_Os08g32880.1	-0.128126	-0.409644	0.121173	disease resistance protein RPM1, putative, expressed
LOC_Os08g32890.1	0.556343	0.101655	0.22439	disease resistance protein RPM1, putative, expressed
LOC_Os08g42670.2	NA	NA	NA	resistance protein, putative, expressed
LOC_Os08g42700.1	0.604676	2.05166	1.50416	resistance protein, putative, expressed
LOC_Os08g42710.1	NA	NA	NA	NB-ARC domain containing protein, expressed
LOC_Os08g42930.1	-0.44627	0.682392	0.191223	disease resistance protein RGA1, putative, expressed
LOC_Os08g43000.1	NA	NA	0.519845	CC-NBS-LRR, putative, expressed
LOC_Os08g43010.1	0.00447996	0.420645	0.494022	disease resistance RPP13-like protein 1, putative, expressed
LOC_Os08g43050.1	-0.485917	0.80236	0.151981	disease resistance protein RGA2, putative, expressed
LOC_Os09g07580.1	NA	NA	NA	mla1, putative, expressed
LOC_Os09g09490.1	-0.301767	-0.306752	0.346861	disease resistance protein RPM1, putative, expressed
LOC_Os09g09750.1	NA	NA	NA	disease resistance protein RPM1, putative, expressed
LOC_Os09g10054.1	0.312484	-0.122217	1.02776	disease resistance protein RPS2, putative, expressed
LOC_Os09g11020.1	-2.01835	1.02297	-1.06512	NBS-LRR disease resistance protein, putative, expressed
LOC_Os09g13820.1	-1.45329	-0.814136	-0.328151	pollen signalling protein with adenylyl cyclase activity, putative, expressed
LOC_Os09g14010.1	NA	NA	NA	disease resistance protein RPS2, putative, expressed
LOC_Os09g14060.1	NA	NA	NA	disease resistance protein RPS2, putative, expressed
LOC_Os09g14100.1	NA	NA	NA	disease resistance protein RPS2, putative, expressed
LOC_Os09g14410.1	0.232573	0.404943	0.470026	expressed protein
LOC_Os09g14450.1	0.31032	0.00982054	-0.306521	pollen signalling protein with adenylyl cyclase activity, putative, expressed
LOC_Os09g14490.1	0.179948	0.323484	-0.286695	TIR-NBS type disease resistance protein, putative, expressed
LOC_Os09g15850.1	-0.164184	-0.113138	0.0640792	Leucine Rich Repeat family protein, expressed
LOC_Os09g16000.1	-2.18828	0.215611	-0.0651171	NBS-LRR disease resistance protein, putative, expressed
LOC_Os09g19280.1	-0.284011	-0.337643	-0.0651171	retrotransposon protein, putative, unclassified, expressed
LOC_Os09g20020.1	-0.0990386	0.541745	-0.289301	NBS-LRR resistance-like protein B8, putative, expressed
LOC_Os09g20030.1	0.570791	0.645744	0.0177025	disease resistance RPP13-like protein 1, putative, expressed
LOC_Os09g20040.1	1.09713	-0.928779	-0.763089	resistance-like protein I2GA-SH194-2, putative, expressed
LOC_Os09g30220.1	-0.127285	-0.23744	0.502932	disease resistance protein RPM1, putative, expressed
LOC_Os09g34150.1	-0.436098	0.263404	-1.28751	NBS-LRR disease resistance protein, putative, expressed
LOC_Os09g34160.1	0.131396	0.747832	1.42821	resistance protein, putative, expressed
LOC_Os10g03570.1	-0.537616	0.872723	0.306852	RGH1A, putative, expressed
LOC_Os10g04060.1	-0.282247	0.230624	0.579901	powdery mildew resistance protein PM3b, putative, expressed
LOC_Os10g04090.1	-0.451195	-0.472136	0.136003	disease resistance RPP13-like protein 1, putative, expressed
LOC_Os10g04110.1	-0.479153	0.228827	-0.0103246	MLA6 protein, putative, expressed
LOC_Os10g04120.1	-0.753318	0.0341362	-0.014668	powdery mildew resistance protein PM3b, putative, expressed
LOC_Os10g04180.1	0.592238	0.448588	0.180249	NB-ARC domain containing protein, expressed
LOC_Os10g04290.1	0.592034	0.896789	0.160175	transposon protein, putative, CACTA, En/Spm sub-class, expressed
LOC_Os10g04674.2	0.0831306	0.0832508	-0.323945	disease resistance protein RPM1, putative, expressed
LOC_Os10g07400.2	0.600559	0.376076	0.309278	disease resistance RPP13-like protein 1, putative, expressed
LOC_Os10g07400.2	NA	NA	NA	disease resistance RPP13-like protein 1, putative, expressed
LOC_Os10g07534.1	0.0529079	-0.0608343	0.286133	disease resistance protein RPM1, putative, expressed
LOC_Os10g07574.1	0.882114	-0.138026	0.157275	transposon protein, putative, unclassified, expressed
LOC_Os10g07978.2	-0.296474	-0.12826	-0.2335	disease resistance protein RPM1, putative, expressed
LOC_Os10g07978.2	NA	NA	NA	disease resistance protein RPM1, putative, expressed
LOC_Os10g10360.3	-0.0299078	0.0532229	0.369733	NBS-LRR disease resistance protein, putative, expressed
LOC_Os10g17690.1	-2.26628	0.537539	-0.202621	NB-ARC domain containing protein, expressed
LOC_Os10g17724.1	NA	NA	NA	retrotransposon, putative, centromere-specific, expressed
LOC_Os10g21400.1	NA	NA	NA	disease resistance protein RPM1, putative, expressed
LOC_Os10g22484.1	0.573046	0.0801708	0.234443	RGH2B, putative, expressed
LOC_Os10g25487.1	-0.113559	-0.271961	-0.0250396	NBS-LRR disease resistance protein, putative, expressed
LOC_Os10g33440.2	-0.111238	0.408709	-0.14549	NB-ARC domain containing protein, expressed
LOC_Os10g36270.1	0.039801	-0.214579	0.117284	disease resistance RPP13-like protein 1, putative, expressed
LOC_Os10g41900.1	NA	NA	NA	mla1, putative, expressed
LOC_Os11g03650.1	0.903647	-0.0544782	-0.443629	mla1, putative, expressed
LOC_Os11g10550.1	-0.537461	0.359086	-0.346631	NBS-LRR disease resistance protein, putative, expressed
LOC_Os11g10570.1	1.98165	NA	NA	NBS-LRR disease resistance protein, putative, expressed
LOC_Os11g10610.1	NA	NA	NA	NBS-LRR disease resistance protein, putative, expressed
LOC_Os11g10770.1	-0.716622	-0.299559	0.150078	disease resistance protein RGA3, putative, expressed
LOC_Os11g11580.1	0.267707	-0.271402	0.0846087	NB-ARC domain containing protein, expressed
LOC_Os11g11770.1	0.734028	-0.122537	0.206736	disease resistance protein RPM1, putative, expressed
LOC_Os11g11810.1	0.156254	0.0699825	0.111711	NBS-LRR disease resistance protein, putative, expressed
LOC_Os11g11920.1	0.307957	0.000716944	-0.0481506	resistance protein, putative, expressed
LOC_Os11g11940.1	0.375031	0.174304	0.28612	MLA10, putative, expressed
LOC_Os11g11950.1	-0.250069	0.46275	-0.122833	disease resistance protein RPM1, putative, expressed
LOC_Os11g11960.1	-0.279817	0.420375	0.484222	disease resistance protein RPM1, putative, expressed
LOC_Os11g11990.1	-0.332378	0.0275386	-0.0543506	NB-ARC domain containing protein, expressed
LOC_Os11g12000.1	0.366125	0.460902	0.73056	NBS-LRR disease resistance protein, putative, expressed
LOC_Os11g12040.1	-0.858267	-0.0450142	0.40327	disease resistance protein RPM1, putative, expressed
LOC_Os11g12050.2	-0.688803	0.243931	0.365095	NBS-LRR type disease resistance protein, putative, expressed
LOC_Os11g12240.1	0.199241	0.0837663	0.636978	retrotransposon protein, putative, unclassified, expressed
LOC_Os11g12320.1	-1.10544	0.339242	0.752019	disease resistance protein RPM1, putative, expressed
LOC_Os11g12330.1	-0.529062	0.21171	0.492685	disease resistance protein RPM1, putative, expressed
LOC_Os11g12340.2	0.554389	0.220457	0.439437	disease resistance protein RPM1, putative, expressed
LOC_Os11g13410.1	0.129479	0.282158	0.0717647	mla1, putative, expressed
LOC_Os11g13430.1	-0.715788	0.203704	-0.124496	RGH1A, putative, expressed
LOC_Os11g13440.1	NA	NA	NA	RGH1A, putative, expressed
LOC_Os11g13510.1	NA	NA	NA	stripe rust resistance protein Yr10, putative, expressed
LOC_Os11g13940.1	0.0413555	-0.142372	-0.153404	NBS-LRR disease resistance protein, putative, expressed
LOC_Os11g14380.1	-1.63984	0.194237	1.41435	resistance protein LR10, putative, expressed
LOC_Os11g15190.1	-0.391394	0.028795	0.361814	RGH1A, putative, expressed
LOC_Os11g15500.1	NA	NA	NA	stripe rust resistance protein Yr10, putative, expressed
LOC_Os11g15700.1	-0.254957	0.569248	0.812026	NB-ARC domain containing protein, expressed
LOC_Os11g16470.2	-0.366274	0.390256	-0.0279641	MLA10, putative, expressed
LOC_Os11g16530.2	0.0738902	-0.259414	0.0338494	mal, putative, expressed
LOC_Os11g16530.2	NA	NA	NA	mal, putative, expressed
LOC_Os11g17014.1	-0.418407	0.151537	0.0638694	NB-ARC domain containing protein, expressed
LOC_Os11g17330.1	0.373967	0.438003	-2.27457	stripe rust resistance protein Yr10, putative, expressed
LOC_Os11g24170.1	-0.536263	-0.0862228	0.319224	CC-NBS-LRR protein, putative, expressed
LOC_Os11g27430.1	-0.127285	-0.314516	0.524171	NB-ARC domain containing protein, expressed
LOC_Os11g27440.1	0.00652393	-0.4925	0.403032	MLA7, putative, expressed
LOC_Os11g28950.1	0.463665	-0.199427	-0.824109	pollen signalling protein with adenylyl cyclase activity, putative, expressed
LOC_Os11g29000.1	0.603138	-1.07984	-2.38705	pollen signalling protein with adenylyl cyclase activity, putative, expressed
LOC_Os11g29014.1	-1.24074	0.417245	NA	retrotransposon protein, putative, unclassified, expressed
LOC_Os11g29050.1	0.160852	-0.0787927	-0.870768	NBS-LRR type disease resistance protein, putative, expressed
LOC_Os11g29090.1	-1.60331	NA	NA	NB-ARC/LRR disease resistance protein, putative, expressed
LOC_Os11g29110.1	-0.963903	-0.122558	-0.0303516	Leucine Rich Repeat family protein, expressed
LOC_Os11g29520.1	-0.579718	-0.419256	-0.434351	NBS-LRR disease resistance protein, putative, expressed
LOC_Os11g29920.1	0.644614	0.322526	1.61295	NB-ARC domain containing protein, expressed
LOC_Os11g29970.1	-0.521098	0.365201	-0.676685	NB-ARC domain containing protein, expressed
LOC_Os11g29980.1	NA	NA	NA	disease resistance RPP13-like protein 1, putative, expressed
LOC_Os11g29990.1	-2.60331	-0.213232	0.934883	NBS-LRR type disease resistance protein, putative, expressed
LOC_Os11g30060.1	NA	NA	NA	NBS-LRR type disease resistance protein Hom-B, putative, expressed
LOC_Os11g30110.1	NA	0.537539	0.934883	disease resistance RPP13-like protein 1, putative, expressed
LOC_Os11g30210.1	0.0122312	0.075505	-0.160502	NBS-LRR type disease resistance protein, putative, expressed
LOC_Os11g32170.1	NA	NA	NA	stripe rust resistance protein Yr10, putative, expressed
LOC_Os11g32210.1	NA	-1.78439	-0.480155	jacalin-like lectin domain containing protein, expressed
LOC_Os11g34880.1	-0.169629	0.107207	-0.0123004	NB-ARC domain containing protein, expressed
LOC_Os11g34920.1	-0.105814	0.458096	-0.380893	stripe rust resistance protein Yr10, putative, expressed
LOC_Os11g34970.1	NA	-0.369352	-0.0651171	NB-ARC domain containing protein, expressed
LOC_Os11g35210.1	0.325604	-0.397366	1.68031	NB-ARC domain containing protein, expressed
LOC_Os11g35580.1	0.151574	1.80057	NA	disease resistance protein RPM1, putative, expressed
LOC_Os11g37740.1	0.218383	-0.00232315	0.34992	stripe rust resistance protein Yr10, putative, expressed
LOC_Os11g37759.1	0.10918	0.0455659	0.0938068	stripe rust resistance protein Yr10, putative, expressed
LOC_Os11g37774.1	0.829646	1.09008	-0.422669	stripe rust resistance protein Yr10, putative, expressed
LOC_Os11g37780.1	NA	0.215611	NA	stripe rust resistance protein Yr10, putative, expressed
LOC_Os11g37850.1	1.34422	-0.480997	0.121968	stripe rust resistance protein Yr10, putative, expressed
LOC_Os11g37860.1	0.26827	0.768805	0.212564	stripe rust resistance protein Yr10, putative, expressed
LOC_Os11g37870.1	-1.43339	0.455077	-0.132231	stripe rust resistance protein Yr10, putative, expressed
LOC_Os11g37880.1	-0.866348	-0.784389	3.79286	stripe rust resistance protein Yr10, putative, expressed
LOC_Os11g39160.1	1.47477	0.996244	0.553071	NBS-LRR disease resistance protein, putative, expressed
LOC_Os11g39310.1	0.371534	0.241446	0.204868	NB-ARC domain containing protein, expressed
LOC_Os11g39320.1	0.395687	0.112485	-0.100015	LZ-NBS-LRR class, putative, expressed
LOC_Os11g40780.1	NA	1.21561	NA	disease resistance protein, putative, expressed
LOC_Os11g41170.1	-0.203229	0.0814519	0.207308	disease resistance protein RPM1, putative, expressed
LOC_Os11g41540.2	-0.650531	-0.62195	0.321483	disease resistance RPP8-like protein 3, putative, expressed
LOC_Os11g42040.1	-0.0771944	0.178353	0.274252	non-TIR-NBS-LRR type resistance protein, putative, expressed
LOC_Os11g42070.1	0.314586	0.0989661	0.348734	Leucine Rich Repeat family protein, expressed
LOC_Os11g42090.1	NA	NA	NA	Leucine Rich Repeat family protein, expressed
LOC_Os11g43700.1	0.202337	0.283488	-0.127274	RGH1A, putative, expressed
LOC_Os11g44580.1	0.561265	0.656778	0.956257	go35 NBS-LRR, putative, expressed
LOC_Os11g44960.1	-1.60331	-1.36935	NA	NBS-LRR disease resistance protein, putative, expressed
LOC_Os11g44970.1	-1.36413	-0.21181	-1.38705	NBS-LRR disease resistance protein, putative, expressed
LOC_Os11g44990.1	2.30358	-0.369352	-0.550544	NB-ARC domain containing protein, expressed
LOC_Os11g45050.1	-0.0183507	-0.249057	-0.473923	NBS-LRR disease resistance protein, putative, expressed
LOC_Os11g45060.1	0.0134216	0.148862	1.17589	NB-ARC domain containing protein, expressed
LOC_Os11g45090.1	NA	NA	NA	NB-ARC domain containing protein, expressed
LOC_Os11g45130.1	0.566612	-0.954314	NA	pollen signalling protein with adenylyl cyclase activity, putative, expressed
LOC_Os11g45160.1	-0.603313	-0.928779	-1.65008	disease resistance protein, putative, expressed
LOC_Os11g45180.1	0.303577	-0.182938	-0.427687	NBS-LRR disease resistance protein, putative, expressed
LOC_Os11g45190.1	-0.0642273	0.174349	1.67185	NB-ARC domain containing protein, expressed
LOC_Os11g45330.1	NA	NA	NA	disease resistance protein RPM1, putative, expressed
LOC_Os11g45620.1	NA	NA	NA	rust-resistance protein Lr21, putative, expressed
LOC_Os11g45750.2	-0.244073	-0.0520011	0.140077	WRKY125, expressed
LOC_Os11g45840.1	-0.197531	-0.120348	-0.302472	expressed protein
LOC_Os11g45924.1	-0.165994	0.256932	0.0163105	WRKY41, expressed
LOC_Os11g45930.1	0.330559	0.600275	-0.194015	NBS-LRR type disease resistance protein, putative, expressed
LOC_Os11g45970.1	NA	NA	1.51985	NBS-LRR disease resistance protein, putative, expressed
LOC_Os11g45980.1	0.73011	-0.157847	0.482371	NBS-LRR type disease resistance protein, putative, expressed
LOC_Os11g46070.1	-0.328691	0.260005	-0.220395	MLA10, putative, expressed
LOC_Os11g46080.1	NA	NA	NA	NB-ARC domain containing protein, expressed
LOC_Os11g46140.1	NA	NA	NA	stripe rust resistance protein Yr10, putative, expressed
LOC_Os11g46200.1	0.15093	0.233758	-0.678649	Leucine Rich Repeat family protein, expressed
LOC_Os11g46210.1	0.339201	-0.123478	0.329162	NB-ARC domain containing protein, expressed
LOC_Os11g47447.1	NA	-1.36935	-1.80208	stripe rust resistance protein Yr10, putative, expressed
LOC_Os11g47780.1	0.981649	NA	NA	pollen signalling protein with adenylyl cyclase activity, putative, expressed
LOC_Os12g03080.1	0.418755	0.0645542	-0.182727	rp3 protein, putative, expressed
LOC_Os12g03750.1	-0.668164	-0.28336	0.271983	Leucine Rich Repeat family protein, expressed
LOC_Os12g06920.1	NA	NA	NA	NBS-LRR disease resistance protein, putative, expressed
LOC_Os12g09240.1	NA	-0.784389	-1.06512	NBS-LRR disease resistance protein, putative, expressed
LOC_Os12g09710.1	NA	NA	NA	NBS-LRR disease resistance protein, putative, expressed
LOC_Os12g09739.1	0.566612	0.0946862	0.100692	pollen signalling protein with adenylyl cyclase activity, putative, expressed
LOC_Os12g10180.1	0.669399	0.13414	0.255658	NBS-LRR type disease resistance protein Rps1-k-2, putative, expressed
LOC_Os12g10330.1	0.00926149	-0.189565	-0.462264	NB-ARC domain containing protein, expressed
LOC_Os12g10340.1	-0.755316	-0.241247	0.496762	NBS-LRR type resistance protein, putative, expressed
LOC_Os12g10360.1	NA	NA	NA	NB-ARC domain containing protein, expressed
LOC_Os12g10390.1	NA	-0.784389	NA	disease resistance protein, putative, expressed
LOC_Os12g10410.1	0.665676	0.354439	-0.0651171	NB-ARC/LRR disease resistance protein, putative, expressed
LOC_Os12g10460.1	NA	-0.269816	-0.939586	rp1, putative
LOC_Os12g10710.1	0.309162	0.0950659	0.166499	NB-ARC domain containing protein, expressed
LOC_Os12g13550.1	1.12055	0.00780611	0.956742	NBS-LRR disease resistance protein, putative, expressed
LOC_Os12g14330.1	1.30358	0.0900801	1.25681	disease resistance protein RPM1, putative, expressed
LOC_Os12g17090.1	-0.574567	-0.151617	-0.38835	stripe rust resistance protein Yr10, putative, expressed
LOC_Os12g17090.1	NA	NA	NA	stripe rust resistance protein Yr10, putative, expressed
LOC_Os12g17340.1	NA	NA	NA	CC-NBS-LRR resistance protein MLA13, putative, expressed
LOC_Os12g17410.1	0.463182	0.215611	-0.541555	NB-ARC domain containing protein, expressed
LOC_Os12g17420.1	NA	NA	NA	resistance protein, putative, expressed
LOC_Os12g17480.1	-0.127975	0.303074	-0.350094	MLA12, putative, expressed
LOC_Os12g17490.1	0.272429	-0.779246	-0.215451	stripe rust resistance protein Yr10, putative, expressed
LOC_Os12g18360.1	0.429723	0.0689728	0.167056	NB-ARC domain containing protein, expressed
LOC_Os12g28040.1	NA	NA	NA	NBS-LRR disease resistance protein, putative, expressed
LOC_Os12g28070.1	NA	NA	NA	NBS-LRR disease resistance protein, putative, expressed
LOC_Os12g28100.1	0.309836	0.0801266	0.147746	NBS-LRR disease resistance protein, putative, expressed
LOC_Os12g28250.1	0.222971	0.0606033	0.347309	disease resistance protein RPM1, putative, expressed
LOC_Os12g29280.1	-0.375044	-0.646885	0.389449	disease resistance protein RGA3, putative, expressed
LOC_Os12g29290.1	-0.603313	0.462251	0.19014	disease resistance protein RGA3, putative, expressed
LOC_Os12g29710.1	NA	NA	NA	NBS-LRR disease resistance protein, putative, expressed
LOC_Os12g30070.1	NA	NA	NA	disease resistance protein RPM1, putative, expressed
LOC_Os12g30080.1	NA	NA	NA	disease resistance protein RPM1, putative, expressed
LOC_Os12g30590.1	-0.0963533	-0.134886	0.42031	disease resistance protein RGA2, putative, expressed
LOC_Os12g30720.1	NA	NA	NA	disease resistance protein RPS2, putative, expressed
LOC_Os12g30760.1	NA	NA	NA	disease resistance protein, putative, expressed
LOC_Os12g31160.1	NA	NA	NA	MLA10, putative, expressed
LOC_Os12g31200.1	NA	NA	NA	NB-ARC domain containing protein, expressed
LOC_Os12g31620.1	NA	NA	NA	disease resistance protein RPM1, putative, expressed
LOC_Os12g32590.1	-0.336209	-0.0415468	1.24383	NB-ARC domain containing protein, expressed
LOC_Os12g32660.1	0.0544859	-0.0977104	0.25091	NB-ARC domain containing protein, expressed
LOC_Os12g32670.1	-0.13188	-0.138323	0.11726	CC-NBS-LRR resistance protein, putative, expressed
LOC_Os12g32680.1	0.718615	0.215611	-0.0651171	NB-ARC domain containing protein, expressed
LOC_Os12g32710.1	-0.354073	-0.133397	0.113128	NB-ARC domain containing protein, expressed
LOC_Os12g33160.1	-0.243446	0.0414688	0.467061	RGH1A, putative, expressed
LOC_Os12g36690.1	-0.412015	-0.068182	0.49431	mla1, putative, expressed
LOC_Os12g36720.1	0.00546572	0.0757733	0.313882	RGH1A, putative, expressed
LOC_Os12g36730.1	0.10105	0.156336	0.358361	stripe rust resistance protein Yr10, putative, expressed
LOC_Os12g37270.1	NA	NA	NA	retrotransposon protein, putative, unclassified, expressed
LOC_Os12g37740.1	0.0506909	0.0614401	-0.0796166	resistance protein LR10, putative, expressed
LOC_Os12g37760.1	0.166289	0.0795396	0.496989	RGH1A, putative, expressed
LOC_Os12g37770.1	0.276005	0.614408	0.921827	RGH1A, putative, expressed
